# Supplementary material for: Climate change accelerates winter transmission of a zoonotic pathogen
Source: PubMed Central journal article supplement (PMC8800963; doi:10.1007/s13280-021-01594-y), 2021-07-06
Supplement: 13280_2021_1594_MOESM1_ESM.pdf [file 13280_2021_1594_MOESM1_ESM.pdf]

## **Ambio**

Electronic Supplementary Material

*This supplementary material has not been peer reviewed.*

Title: **Climate change accelerates winter transmission of a zoonotic pathogen**

Supplementary table 1. Top five models (lowest AICc values) best predicting PUUV spring seroprevalence bank voles. All candidate variables included in comparison of all model subsets are listed below the table.

| <b>Model Rank</b> | <b>Variables</b>                                                                           | <b>Log likelihood</b> | <b>AICc</b> | <b>ΔAICc</b> | <b>Model weight</b> |
|-------------------|--------------------------------------------------------------------------------------------|-----------------------|-------------|--------------|---------------------|
| 1                 | November rain + Bank vole autumn density + Bank vole spring density                        | -38.32                | 88.28       | 0            | 0.2                 |
| 2                 | Rainy days in November + Bank vole autumn density + Bank vole spring density               | -39.08                | 89.8        | 1.52         | 0.09                |
| 3                 | November rain + Bank vole autumn density + Bank vole spring density + Winter temperature   | -38.02                | 92.05       | 3.76         | 0.03                |
| 4                 | November rain + Bank vole autumn density + Bank vole spring density + Rainy days in winter | -38.05                | 92.11       | 3.82         | 0.03                |
| 5                 | November rain + Bank vole autumn density + Bank vole spring density + Winter rain          | -38.17                | 92.34       | 4.06         | 0.03                |

All candidate variables: November rain (mm), Rainy days in November, November T (C°, mean), October rain (mm), Rainy days in October, Rainy days in Autumn (= October and November combined as one variable), Bank vole autumn density, Bank vole spring density, Rainy days in winter, Winter rain (mm), Winter T (C°, mean)
